# Supplementary material
Source: MDPI journal article supplement (https://www.mdpi.com/2073-4352/13/8/1269)
Supplement: s1 [file s1]

# *Crystals*

Supporting Information for

## **Investigation of the high-pressure behaviors of Amblygonite by Single-crystal X-ray diffraction, Raman Spectroscopy, and DFT calculations**

Fei Qin<sup>1\*</sup>, Bingxu Hou<sup>2</sup>, Kailan Hu<sup>1</sup>, Jingjing Niu<sup>3</sup>, Dongzhou Zhang<sup>4</sup>

<sup>1</sup> School of Earth Sciences and Resources, China University of Geosciences (Beijing), Beijing 100083, China; 2001220097@email.cugb.edu.cn

<sup>2</sup> School of Earth and Space Sciences, Peking University, Beijing 100871, China; bxhou@pku.edu.cn

<sup>3</sup> State Key Laboratory of Tibetan Plateau Earth System Science, Resources and Environment (TPESRE), Institute of Tibetan Plateau Research, Chinese Academy of Sciences, Beijing 100101, China; jjniu@itpcas.ac.cn

<sup>4</sup> School of Ocean and Earth Science and Technology, Hawai'i Institute of Geophysics and Planetology, University of Hawaii at Manoa, Honolulu, HI 96822, USA; dzhang@hawaii.edu

\* Correspondence: fei.qin@cugb.edu.cn

Tables S1 to S2

**Table S1 Lattice parameters of amblygonite at various pressures.**

| Pressure<br>(GPa) | $a$ (Å)   | $b$ (Å)   | $c$ (Å)   | $\alpha$  | $\beta$   | $\gamma$  | $V$ (Å <sup>3</sup> ) |
|-------------------|-----------|-----------|-----------|-----------|-----------|-----------|-----------------------|
| 0.00001           | 5.0338(3) | 5.191(1)  | 7.0160(6) | 106.63(1) | 109.26(1) | 97.933(1) | 160.3(1)              |
| 1.0(1)            | 5.030(1)  | 5.185(3)  | 7.011(2)  | 106.65(1) | 109.33(1) | 97.83(1)  | 159.8(3)              |
| 2.5(1)            | 5.012(3)  | 5.164(3)  | 6.984(1)  | 106.62(2) | 109.33(1) | 97.89(2)  | 158.0(3)              |
| 4.7(1)            | 4.983(1)  | 5.135(3)  | 6.940(1)  | 106.61(2) | 109.36(1) | 97.90(2)  | 155.1(3)              |
| 7.3(1)            | 4.952(1)  | 5.109(1)  | 6.894(1)  | 106.65(3) | 109.39(3) | 97.85(3)  | 152.4(3)              |
| 9.9(1)            | 4.925(1)  | 5.081(3)  | 6.853(1)  | 106.65(3) | 109.39(3) | 97.75(3)  | 149.8(3)              |
| 12.8(1)           | 4.893(2)  | 5.052(2)  | 6.803(3)  | 106.66(2) | 109.47(1) | 97.72(2)  | 146.9(3)              |
| 15.0(1)           | 4.874(4)  | 5.033(4)  | 6.777(1)  | 106.70(3) | 109.55(1) | 97.75(3)  | 145.1(3)              |
| 17.4(1)           | 4.8532(3) | 5.011(3)  | 6.746(9)  | 106.72(2) | 109.51(1) | 97.63(2)  | 143.3(2)              |
| 20.0(1)           | 4.8334(3) | 4.9834(4) | 6.715(1)  | 106.71(2) | 109.50(8) | 97.63(2)  | 141.3(2)              |
| 23.0(1)           | 4.8101(3) | 4.960(3)  | 6.679(1)  | 106.70(2) | 109.51(1) | 97.56(2)  | 139.2(2)              |
| 25.2(2)           | 4.7928(7) | 4.939(5)  | 6.653(2)  | 106.54(5) | 109.45(2) | 97.77(5)  | 137.1(1)              |
| 27.7(2)           | 4.778(2)  | 4.922(4)  | 6.636(3)  | 106.76(2) | 109.52(1) | 97.47(2)  | 136.3(2)              |
| 30.1(2)           | 4.760(1)  | 4.900(4)  | 6.608(3)  | 106.60(8) | 109.52(3) | 97.61(8)  | 134.8(2)              |
| 32.1(2)           | 4.748(1)  | 4.887(4)  | 6.590(3)  | 106.60(7) | 109.52(3) | 97.57(7)  | 133.7(2)              |
| 34.4(2)           | 4.7350(4) | 4.866(3)  | 6.569(1)  | 106.76(3) | 109.59(1) | 97.28(3)  | 132.3(2)              |

**Table S2 Bond length ( $\text{\AA}$ ), Polyhedral Volume ( $\text{\AA}^3$ ), Distortion index ( $D$ ), Quadratic ( $\lambda$ ) and Bond angle variance ( $\sigma^2$ ) for various polyhedra in Amblygonite at pressures up to 28.4 GPa.**

| Pressure (GPa)                                  | 1.9     | 5.4     | 9.5     | 14.1    | 19.2    | 22.1    | 25.1    | 28.3    |
|-------------------------------------------------|---------|---------|---------|---------|---------|---------|---------|---------|
| <b>AlIO<sub>4</sub>F<sub>2</sub></b>            |         |         |         |         |         |         |         |         |
| Mean bond length ( $\text{\AA}$ )               | 1.8706  | 1.8566  | 1.8428  | 1.8289  | 1.8159  | 1.8094  | 1.8027  | 1.7966  |
| Volume ( $\text{\AA}^3$ )                       | 8.7017  | 8.5041  | 8.3134  | 8.1240  | 7.9518  | 7.8637  | 7.7787  | 7.6975  |
| Distortion index ( $D$ )                        | 0.01203 | 0.01445 | 0.01618 | 0.01745 | 0.01848 | 0.01926 | 0.01946 | 0.01984 |
| Quadratic ( $\lambda$ )                         | 1.0022  | 1.0025  | 1.0027  | 1.0030  | 1.0031  | 1.0033  | 1.0033  | 1.0034  |
| Bond angle variance ( $\sigma^2$ )              | 6.5702  | 7.3839  | 7.8161  | 8.2673  | 8.3230  | 9.0099  | 8.6873  | 9.0863  |
| <b>Al<sub>2</sub>O<sub>4</sub>F<sub>2</sub></b> |         |         |         |         |         |         |         |         |
| Mean bond length ( $\text{\AA}$ )               | 1.8744  | 1.8615  | 1.8489  | 1.8361  | 1.8243  | 1.8181  | 1.8125  | 1.8067  |
| Volume ( $\text{\AA}^3$ )                       | 8.7681  | 8.5768  | 8.3888  | 8.1994  | 8.0195  | 7.9258  | 7.8407  | 7.7517  |
| Distortion index ( $D$ )                        | 0.00239 | 0.00394 | 0.00529 | 0.00575 | 0.00646 | 0.00736 | 0.00747 | 0.00823 |
| Quadratic ( $\lambda$ )                         | 1.0010  | 1.0019  | 1.0030  | 1.0044  | 1.0064  | 1.0074  | 1.0084  | 1.0096  |
| Bond angle variance ( $\sigma^2$ )              | 3.4997  | 6.5055  | 10.6753 | 15.645  | 22.5465 | 26.3130 | 29.8821 | 34.1880 |
| <b>PO<sub>4</sub></b>                           |         |         |         |         |         |         |         |         |
| Mean bond length ( $\text{\AA}$ )               | 1.5467  | 1.5421  | 1.5375  | 1.5327  | 1.5282  | 1.5251  | 1.5225  | 1.5201  |
| Volume ( $\text{\AA}^3$ )                       | 1.8900  | 1.8737  | 1.8571  | 1.8399  | 1.8232  | 1.8122  | 1.8024  | 1.7933  |
| Distortion index ( $D$ )                        | 0.00646 | 0.0064  | 0.00532 | 0.00698 | 0.00575 | 0.0054  | 0.00525 | 0.0050  |
| Quadratic ( $\lambda$ )                         | 1.0032  | 1.0031  | 1.0030  | 1.0029  | 1.0031  | 1.0031  | 1.0033  | 1.0035  |
| Bond angle variance ( $\sigma^2$ )              | 12.2521 | 11.730  | 11.420  | 11.2516 | 11.911  | 12.2085 | 12.8149 | 13.9570 |
| <b>LiO<sub>4</sub>F</b>                         |         |         |         |         |         |         |         |         |
| Mean bond length ( $\text{\AA}$ )               | 2.0776  | 2.0551  | 2.0333  | 2.0099  | 1.9913  | 1.9785  | 1.9672  | 1.9578  |
| Volume ( $\text{\AA}^3$ )                       | 6.5523  | 6.3168  | 6.0919  | 5.8754  | 5.6651  | 5.5618  | 5.4665  | 5.3770  |
| Distortion index ( $D$ )                        | 0.03921 | 0.04171 | 0.05073 | 0.05815 | 0.06679 | 0.06895 | 0.07257 | 0.07611 |
